# Supplementary material for: Aspen Plus® Process Simulation Model of the Biomass Ash-Based Treatment of Anaerobic Digestate for Production of Fertilizer and Upgradation of Biogas
Source: MDPI journal article supplement (doi:10.3390/en16073039), 2023-03-27
Supplement: s1 [file s1]

## **Supplementary material**

### **Aspen Plus® process simulation model of the biomass ash-based treatment of anaerobic digestate for production of fertilizer and upgradation of biogas**

Alejandro Moure Abelenda<sup>1,\*</sup>, Abdikhani Ali<sup>1</sup>, Kirk T. Semple<sup>2</sup>, and Farid Aiouache<sup>1,\*</sup>

<sup>1</sup> School of Engineering, Lancaster University, Lancaster LA1 4YW, UK

<sup>2</sup> Lancaster Environment Centre, Lancaster University, Lancaster, LA1 4YQ, UK

\*Corresponding authors:

a.moureabelenda@lancaster.ac.uk, ORCID: 0000-0002-6583-4626

f.aiouache@lancaster.ac.uk, ORCID: 0000-0002-0216-6907

**Table S1.** Mass balance of the nutrients monitored in the Aspen Plus® simulations. (1/3)

| <b>Stream</b>    | <b>Parameter</b>                  | <b>Case 1</b> | <b>Case 2</b> | <b>Case 3</b> | <b>Case 4</b> | <b>Case 5</b> | <b>Case 6</b> | <b>Case 7</b> |
|------------------|-----------------------------------|---------------|---------------|---------------|---------------|---------------|---------------|---------------|
| <b>Biogas</b>    | <b>Carbon Dioxide/(vol.%)</b>     | 3.43E+01      | 5.77E+01      | 5.82E+01      | 5.92E+01      | 5.65E+01      | 1.42E+01      | 4.77E-05      |
|                  | <b>Ammonia/(vol.%)</b>            | 4.61E-05      | 4.61E-04      | 1.00E-01      | 6.56E-02      | 1.18E-02      | 1.77E+01      | 7.49E+00      |
|                  | <b>Methane/(vol.%)</b>            | 4.88E+01      | 2.78E+01      | 2.69E+01      | 2.60E+01      | 2.86E+01      | 5.48E+01      | 7.83E+01      |
| <b>Digestate</b> | <b>pH</b>                         | 7.41          | 7.40          | 4.10          | 3.24          | 9.26          | 12.34         | 13.24         |
| <b>Nitrogen</b>  | <b>Organic flow/(mol/hr)</b>      | 1.01E-03      | 1.31E-03      | 9.86E-04      | 9.80E-04      | 9.97E-04      | 9.51E-04      | 2.25E-03      |
|                  | <b>Inorganic flow/(mol/hr)</b>    | 3.50E-05      | 1.91E-03      | 4.85E-03      | 4.65E-03      | 5.09E-04      | 2.16E-02      | 9.70E-03      |
|                  | <b>Organic fraction/(mol.%)</b>   | 1.90E-03      | 2.08E-03      | 1.64E-03      | 1.63E-03      | 1.66E-03      | 1.44E-03      | 3.39E-03      |
|                  | <b>Inorganic fraction/(mol.%)</b> | 6.60E-05      | 3.05E-03      | 8.09E-03      | 7.75E-03      | 8.49E-04      | 3.26E-02      | 1.47E-02      |
|                  | <b>Organic N/(g/l)</b>            | 9.53E-02      | 6.69E-02      | 5.59E-02      | 5.56E-02      | 5.76E-02      | 5.39E-02      | 9.70E-02      |
|                  | <b>Inorganic N/(g/l)</b>          | 3.32E-03      | 9.80E-02      | 2.75E-01      | 2.64E-01      | 2.94E-02      | 1.22E+00      | 4.19E-01      |
|                  | <b>WS flow/(mol/hr)</b>           | 1.04E-03      | 1.30E-03      | 1.12E-03      | 1.07E-03      | 9.96E-04      | 9.44E-04      | 2.25E-03      |
|                  | <b>WI flow/(mol/hr)</b>           | 5.66E-06      | 1.16E-03      | 4.03E-04      | 1.31E-04      | 5.10E-04      | 2.16E-02      | 9.70E-03      |
|                  | <b>WS fraction/(mol.%)</b>        | 1.95E-01      | 2.08E-01      | 1.86E-01      | 1.78E-01      | 1.66E-01      | 1.43E-01      | 3.39E-01      |
|                  | <b>WI fraction/(mol.%)</b>        | 1.07E-03      | 1.85E-01      | 6.73E-02      | 2.18E-02      | 8.51E-02      | 3.26E+00      | 1.47E+00      |
|                  | <b>WS N/(mol/l)</b>               | 9.81E-02      | 6.68E-02      | 6.33E-02      | 6.04E-02      | 5.75E-02      | 5.35E-02      | 9.70E-02      |
|                  | <b>WI N/(mol/l)</b>               | 5.36E-04      | 5.93E-02      | 2.29E-02      | 7.41E-03      | 2.95E-02      | 1.22E+00      | 4.19E-01      |

**Table S2.** Mass balance of the nutrients monitored in the Aspen Plus® simulations. (2/3)

| <b>Element</b>     | <b>Parameter</b>           | <b>Case 1</b> | <b>Case 2</b> | <b>Case 3</b> | <b>Case 4</b> | <b>Case 5</b> | <b>Case 6</b> | <b>Case 7</b> |
|--------------------|----------------------------|---------------|---------------|---------------|---------------|---------------|---------------|---------------|
| <b>Phosphorous</b> | <b>WS flow/(mol/hr)</b>    | 4.72E-04      | 1.90E-03      | 1.94E-03      | 1.24E-03      | 1.60E-03      | 2.42E-03      | 1.92E-03      |
|                    | <b>WI flow/(mol/hr)</b>    | 1.04E-05      | 2.35E-13      | 0.00E+00      | 0.00E+00      | 6.91E-05      | 0.00E+00      | 0.00E+00      |
|                    | <b>WS fraction/(mol.%)</b> | 8.90E-03      | 3.03E-01      | 3.24E-01      | 2.07E-01      | 2.67E-01      | 3.65E-01      | 2.90E-01      |
|                    | <b>WI fraction/(mol.%)</b> | 1.96E-03      | 3.75E-11      | 0.00E+00      | 0.00E+00      | 1.15E-02      | 0.00E+00      | 0.00E+00      |
|                    | <b>WS P/(mol/l)</b>        | 4.47E-03      | 9.74E-02      | 1.10E-01      | 7.03E-02      | 9.25E-02      | 1.37E-01      | 8.29E-02      |
|                    | <b>WI P/(mol/l)</b>        | 9.85E-04      | 1.20E-11      | 0.00E+00      | 0.00E+00      | 3.99E-03      | 0.00E+00      | 0.00E+00      |
| <b>Potassium</b>   | <b>WS flow/(mol/hr)</b>    | 8.81E-04      | 1.09E-02      | 3.52E-03      | 3.63E-03      | 4.20E-03      | 3.04E-03      | 1.93E-03      |
|                    | <b>WI flow/(mol/hr)</b>    | 0.00E+00      | 0.00E+00      | 0.00E+00      | 0.00E+00      | 0.00E+00      | 0.00E+00      | 8.67E-04      |
|                    | <b>WS fraction/(%)</b>     | 1.66E-01      | 1.74E+00      | 5.88E-01      | 6.06E-01      | 7.01E-01      | 4.59E-01      | 2.91E-01      |
|                    | <b>WI fraction/(%)</b>     | 0.00E+00      | 0.00E+00      | 0.00E+00      | 0.00E+00      | 0.00E+00      | 0.00E+00      | 1.31E-01      |
|                    | <b>WS K/(mol/l)</b>        | 8.35E-02      | 5.59E-01      | 2.00E-01      | 2.06E-01      | 2.43E-01      | 1.72E-01      | 8.33E-02      |
|                    | <b>WI K/(mol/l)</b>        | 0.00E+00      | 0.00E+00      | 0.00E+00      | 0.00E+00      | 0.00E+00      | 0.00E+00      | 3.74E-02      |
| <b>Carbon</b>      | <b>WS flow/(mol/hr)</b>    | 2.77E-03      | 4.97E-03      | 3.49E-03      | 3.43E-03      | 3.54E-03      | 6.78E-03      | 7.89E-03      |
|                    | <b>WI flow/(mol/hr)</b>    | 3.42E-04      | 8.24E-04      | 3.27E-04      | 3.26E-04      | 3.26E-04      | 3.78E-04      | 6.19E-04      |
|                    | <b>WS fraction/(mol.%)</b> | 5.22E-01      | 7.92E-01      | 5.83E-01      | 5.71E-01      | 5.90E-01      | 1.02E+00      | 1.19E+00      |
|                    | <b>WI fraction/(mol.%)</b> | 6.45E-02      | 1.31E-01      | 5.45E-02      | 5.44E-02      | 5.44E-02      | 5.72E-02      | 9.35E-02      |
|                    | <b>WS C/(mol/l)</b>        | 2.62E-01      | 2.54E-01      | 1.98E-01      | 1.94E-01      | 2.04E-01      | 3.84E-01      | 3.41E-01      |
|                    | <b>WI C/(mol/l)</b>        | 3.24E-02      | 4.22E-02      | 1.85E-02      | 1.85E-02      | 1.89E-02      | 2.15E-02      | 2.67E-02      |

**Table S3.** Mass balance of the nutrients tracked in the Aspen Plus® simulations. (3/3)

| <b>Element</b>   | <b>Parameter</b>           | <b>Case 1</b> | <b>Case 2</b> | <b>Case 3</b> | <b>Case 4</b> | <b>Case 5</b> | <b>Case 6</b> | <b>Case 7</b> |
|------------------|----------------------------|---------------|---------------|---------------|---------------|---------------|---------------|---------------|
| <b>Magnesium</b> | <b>WS flow/(mol/hr)</b>    | 2.44E-04      | 2.77E-03      | 3.16E-03      | 2.99E-03      | 3.25E-03      | 8.92E-03      | 9.79E-03      |
|                  | <b>WI flow/(mol/hr)</b>    | 0.00E+00      |
|                  | <b>WS fraction/(mol.%)</b> | 4.60E-02      | 4.41E-01      | 5.26E-01      | 4.98E-01      | 5.43E-01      | 1.35E+00      | 1.48E+00      |
|                  | <b>WI fraction/(mol.%)</b> | 0.00E+00      |
|                  | <b>WS Mg/(mol/l)</b>       | 2.31E-02      | 1.42E-01      | 1.79E-01      | 1.69E-01      | 1.88E-01      | 5.06E-01      | 4.23E-01      |
|                  | <b>WI Mg/(mol/l)</b>       | 0.00E+00      |
| <b>Calcium</b>   | <b>WS flow/(mol/hr)</b>    | 1.76E-04      | 6.66E-03      | 3.19E-03      | 3.53E-03      | 4.00E-03      | 8.28E-03      | 8.11E-03      |
|                  | <b>WI flow/(mol/hr)</b>    | 0.00E+00      |
|                  | <b>WS fraction/(mol.%)</b> | 3.32E-02      | 1.06E+00      | 5.33E-01      | 5.89E-01      | 6.67E-01      | 1.25E+00      | 1.22E+00      |
|                  | <b>WI fraction/(mol.%)</b> | 0.00E+00      |
|                  | <b>WS Ca/(mol/l)</b>       | 1.67E-02      | 3.41E-01      | 1.81E-01      | 2.00E-01      | 2.31E-01      | 4.70E-01      | 3.50E-01      |
|                  | <b>WI Ca/(mol/l)</b>       | 0.00E+00      |
| <b>Sulphur</b>   | <b>WS flow/(mol/hr)</b>    | 1.17E-05      | 1.32E-03      | 5.24E-06      | 6.80E-04      | 2.53E-06      | 3.20E-03      | 3.60E-03      |
|                  | <b>WI flow/(mol/hr)</b>    | 6.57E-07      | 2.89E-06      | 2.08E-06      | 1.98E-06      | 1.95E-06      | 1.00E-05      | 1.01E-05      |
|                  | <b>WS fraction/(mol.%)</b> | 2.21E-03      | 2.11E-01      | 8.74E-04      | 1.13E-01      | 4.22E-04      | 4.83E-01      | 5.44E-01      |
|                  | <b>WI fraction/(mol.%)</b> | 1.24E-04      | 4.61E-04      | 3.47E-04      | 3.31E-04      | 3.25E-04      | 1.51E-03      | 1.53E-03      |
|                  | <b>WS S/(mol/l)</b>        | 1.11E-03      | 6.76E-02      | 2.97E-04      | 3.86E-02      | 1.46E-04      | 1.81E-01      | 1.55E-01      |
|                  | <b>WI S/(mol/l)</b>        | 6.23E-05      | 1.48E-04      | 1.18E-04      | 1.13E-04      | 1.13E-04      | 5.69E-04      | 4.36E-04      |

**Table S4.** List of the components in the PSM of Rajendran et al. [11]. (1/3)

| <b>Component ID</b>                           | <b>Type</b>  | <b>Component name</b>        | <b>Alias</b>                                                  |
|-----------------------------------------------|--------------|------------------------------|---------------------------------------------------------------|
| WATER                                         | Conventional | WATER                        | H <sub>2</sub> O                                              |
| GLYCEROL                                      | Conventional | GLYCEROL                     | C <sub>3</sub> H <sub>8</sub> O <sub>3</sub>                  |
| OLEIC-AC                                      | Conventional | OLEIC-ACID                   | C <sub>18</sub> H <sub>34</sub> O <sub>2</sub>                |
| DEXTROSE                                      | Conventional | DEXTROSE                     | C <sub>6</sub> H <sub>12</sub> O <sub>6</sub>                 |
| ACETI-AC                                      | Conventional | ACETIC-ACID                  | C <sub>2</sub> H <sub>4</sub> O <sub>2</sub>                  |
| PROPI-01                                      | Conventional | PROPIONIC-ACID               | C <sub>3</sub> H <sub>6</sub> O <sub>2</sub>                  |
| ISOBU-01                                      | Conventional | ISOBUTYRIC-ACID              | C <sub>4</sub> H <sub>8</sub> O <sub>2</sub>                  |
| ISOVA-01                                      | Conventional | ISOVALERIC-ACID              | C <sub>5</sub> H <sub>10</sub> O <sub>2</sub>                 |
| H <sup>+</sup>                                | Conventional | H <sup>+</sup>               | H <sup>+</sup>                                                |
| OH <sup>-</sup>                               | Conventional | OH <sup>-</sup>              | OH <sup>-</sup>                                               |
| NH <sub>3</sub>                               | Conventional | AMMONIA                      | NH <sub>3</sub>                                               |
| NH <sub>4</sub> <sup>+</sup>                  | Conventional | NH <sub>4</sub> <sup>+</sup> | NH <sub>4</sub> <sup>+</sup>                                  |
| CO <sub>2</sub>                               | Conventional | CARBON-DIOXIDE               | CO <sub>2</sub>                                               |
| C <sub>5</sub> H <sub>7</sub> NO <sub>2</sub> | Conventional | ETHYL-CYANOACETATE           | C <sub>5</sub> H <sub>7</sub> NO <sub>2</sub>                 |
| ARGININE                                      | Conventional | ARGININE                     | C <sub>6</sub> H <sub>14</sub> N <sub>4</sub> O <sub>2</sub>  |
| HISTIDIN                                      | Conventional | HISTIDINE-E-2                | C <sub>6</sub> H <sub>8</sub> N <sub>3</sub> O <sub>2</sub>   |
| LYSINE                                        | Conventional | LYSINE                       | C <sub>6</sub> H <sub>14</sub> N <sub>2</sub> O <sub>2</sub>  |
| TYROSINE                                      | Conventional | TYROSINE                     | C <sub>9</sub> H <sub>11</sub> NO <sub>3</sub>                |
| TRYPTOPH                                      | Conventional | TRYPTOPHAN                   | C <sub>11</sub> H <sub>12</sub> N <sub>2</sub> O <sub>2</sub> |
| PHENYLAL                                      | Conventional | L-PHENYLALANINE              | C <sub>9</sub> H <sub>11</sub> NO <sub>2</sub>                |
| CYSTEINE                                      | Conventional | CYSTEINE-E-2                 | C <sub>3</sub> H <sub>6</sub> NO <sub>2</sub> S               |
| METHIONI                                      | Conventional | METHIONINE                   | C <sub>5</sub> H <sub>11</sub> NO <sub>2</sub> S              |
| THREONIN                                      | Conventional | THREONINE                    | C <sub>4</sub> H <sub>9</sub> NO <sub>3</sub>                 |
| SERINE                                        | Conventional | SERINE                       | C <sub>3</sub> H <sub>7</sub> NO <sub>3</sub>                 |
| LEUCINE                                       | Conventional | LEUCINE                      | C <sub>6</sub> H <sub>13</sub> NO <sub>2</sub>                |
| ISOLEUCI                                      | Conventional | ISOLEUCINE                   | C <sub>6</sub> H <sub>13</sub> NO <sub>2</sub>                |

**Table S5.** List of the components in the PSM of Rajendran et al. [11]. (2/3)

| Component ID                   | Type         | Component name                | Alias                                           |
|--------------------------------|--------------|-------------------------------|-------------------------------------------------|
| VALINE                         | Conventional | VALINE                        | C <sub>5</sub> H <sub>11</sub> NO <sub>2</sub>  |
| GLUTAMIC                       | Conventional | L-GLUTAMIC-ACID               | C <sub>5</sub> H <sub>9</sub> NO <sub>4</sub>   |
| ASPARTIC                       | Conventional | ASPARTIC-ACID                 | C <sub>4</sub> H <sub>7</sub> NO <sub>4</sub>   |
| GLYCINE                        | Conventional | GLYCINE                       | C <sub>2</sub> H <sub>5</sub> NO <sub>2</sub>   |
| ALANINE                        | Conventional | ALANINE                       | C <sub>3</sub> H <sub>7</sub> NO <sub>2</sub>   |
| PROLINE                        | Conventional | PROLINE                       | C <sub>5</sub> H <sub>9</sub> NO <sub>2</sub>   |
| HYDROGEN                       | Conventional | HYDROGEN                      | H <sub>2</sub>                                  |
| METHANE                        | Conventional | METHANE                       | CH <sub>4</sub>                                 |
| INDOLE                         | Conventional | INDOLE                        | C <sub>8</sub> H <sub>7</sub> N                 |
| FROMAMID                       | Conventional | FORMAMIDE                     | CH <sub>3</sub> NO                              |
| H <sub>2</sub> S               | Conventional | HYDROGEN-SULFIDE              | H <sub>2</sub> S                                |
| CH <sub>4</sub> S              | Conventional | METHYL-MERCAPTAN              | CH <sub>4</sub> S                               |
| BENZENE                        | Conventional | BENZENE                       | C <sub>6</sub> H <sub>6</sub>                   |
| PHENOL                         | Conventional | PHENOL                        | C <sub>6</sub> H <sub>6</sub> O                 |
| H <sub>2</sub> CO <sub>3</sub> | Conventional | CARBONIC-ACID                 | H <sub>2</sub> CO <sub>3</sub>                  |
| HCO <sub>3</sub> <sup>-</sup>  | Conventional | HCO <sub>3</sub> <sup>-</sup> | HCO <sub>3</sub> <sup>-</sup>                   |
| CO <sub>3</sub> <sup>2-</sup>  | Conventional | CO <sub>3</sub> <sup>2-</sup> | CO <sub>3</sub> <sup>2-</sup>                   |
| HS <sup>-</sup>                | Conventional | HS <sup>-</sup>               | HS <sup>-</sup>                                 |
| CELLULOS                       | Conventional | CELLULOSE                     | CELLULOSE                                       |
| HEMECELL                       | Conventional | GLUTARIC-ACID                 | C <sub>5</sub> H <sub>8</sub> O <sub>4</sub>    |
| GLUCOSE                        | Conventional | DEXTROSE                      | C <sub>6</sub> H <sub>12</sub> O <sub>6</sub>   |
| TRIOLEIN                       | Conventional | TRIOLEIN                      | C <sub>57</sub> H <sub>104</sub> O <sub>6</sub> |
| TRIPALM                        | Conventional | TRIPALMITIN                   | C <sub>51</sub> H <sub>98</sub> O <sub>6</sub>  |
| PALM                           | Conventional | 1-HEXADECANOL                 | C <sub>16</sub> H <sub>34</sub> O               |
| SN-1--01                       | Conventional | SN-1-PALMITO-2-OLEIN          | C <sub>37</sub> H <sub>70</sub> O <sub>5</sub>  |
| SN-1--02                       | Conventional | SN-1-PALMITO-2-LINOLEIN       | C <sub>37</sub> H <sub>68</sub> O <sub>5</sub>  |

**Table S6.** List of the components in the PSM of Rajendran et al. [11]. (3/3)

| <b>Component ID</b>              | <b>Type</b>     | <b>Component name</b>            | <b>Alias</b>                                                    |
|----------------------------------|-----------------|----------------------------------|-----------------------------------------------------------------|
| XYLOSE                           | Conventional    | D-XYLOSE                         | C <sub>5</sub> H <sub>10</sub> O <sub>5</sub>                   |
| FURFURAL                         | Conventional    | FURFURAL                         | C <sub>5</sub> H <sub>4</sub> O <sub>2</sub>                    |
| LINOLEIC                         | Conventional    | LINOLEIC-ACID                    | C <sub>18</sub> H <sub>32</sub> O <sub>2</sub>                  |
| STARCH                           | Conventional    | CELLULOSE                        | CELLULOSE                                                       |
| ETHANOL                          | Conventional    | ETHANOL                          | C <sub>2</sub> H <sub>6</sub> O                                 |
| PROTEIN                          | Pseudocomponent |                                  | C <sub>13</sub> H <sub>25</sub> O <sub>7</sub> N <sub>3</sub> S |
| KERATIN                          | Pseudocomponent |                                  | C <sub>4.39</sub> H <sub>8</sub> NO <sub>2.1</sub>              |
| ACETATE                          | Conventional    | CH <sub>3</sub> COO <sup>-</sup> | CH <sub>3</sub> COO <sup>-</sup>                                |
| INERT                            | Pseudocomponent |                                  | INERT                                                           |
| AMMON(S)                         | Solid           | AMMONIUM-CARBAMATE               | NH <sub>2</sub> COONH <sub>4</sub>                              |
| NH <sub>4</sub> HS (S)           | Solid           | AMMONIUM-HYDROGEN-SULFIDE        | NH <sub>4</sub> HS                                              |
| NH <sub>4</sub> HCO <sub>3</sub> | Solid           | AMMONIUM-HYDROGEN-CARBONATE      | NH <sub>4</sub> HCO <sub>3</sub>                                |
| NH <sub>2</sub> COO <sup>-</sup> | Conventional    | CARBAMATE                        | NH <sub>2</sub> COO <sup>-</sup>                                |
| S <sup>2-</sup>                  | Conventional    | S <sup>2-</sup>                  | S <sup>2-</sup>                                                 |
